# Supplementary material for: Genome-wide analysis of the WSD family in sunflower and functional identification of HaWSD9 involvement in wax ester biosynthesis and osmotic stress
Source: Front Plant Sci. 2022 Sep 23;13:975853. doi: 10.3389/fpls.2022.975853 (PMC9539440; doi:10.3389/fpls.2022.975853)
Supplement: Supplementary file 2 [file Table_2.xlsx]

## Sheet: Table S2
Supplementary Table S2 The information of sunflower HaWSD and Arabidopsis AtWSD sequences in this study
Gene Name	Gene ID	Protein Sequence
HaWSD1	OTG29248	SLMSLLLACTRQTSNPDAVPTVPTNKASKAGWFSSYSYRGGGPWWQRCFMTFCMVWWLVWNTLVDVGHFMATALFLEDTETPIKAPVGVELNPKRFAYRTVSLDDMKLIKNAMNVTINDVAIGVTQAGLSQYLNRRYGEGQKDEGATEKKNNLPKKKIRLRSTLLINIRPSSGIQALADMMEKNTEAKWGNWIGFVILPLTVGIRDDPLDYVRDAKATTERKKHSLEALYSFSVASMVLKLFHIKAANTPLTHTTLGFSNLVGPQEEIGFYGHVIDFIAPSCYGHPHVVDDKNGGIMKWVPTNVNLDNHIIIPNIPQTLETPDKFLEEYLYNLSKTSIDSSQPMWDLHLLNLKTSDETEAMGILRVHHSLGDGTSLMSLLLACTRQTSNPDAVPTVPTN…
HaWSD2	OTG29986	MNDEPLSPAGRLFVQPATHQIINCTLGLEQPLSLDAAKHVVSNSLMIQHPRFSSLLVTDNNGREYWRKTELNIDRHIILRPDPIGEAVSDEAAINDYVADLTVSSPLSYDKPLWEIHLLPAHKCVVLRIHHALGDGISLMSLMLTLTRKLDDPDQTPAIEPLVSSKRKRNENETLGEFIKVLKMICFSLIYVIEFIMRGVWVNDGKTVVRGGEGVEMWPRKLVTARFRVEDMKTVKNAVSDATINDVLFGVISLGLSKYLGKRSPDSLQEGLRITGVALVNLRPSPGLQDIKELMKKNAAGTGWGNKIGIILLPVYYHRNGSDPLQYLKRAKTMLDRKKLSLEAVLSHQIGHFVMKFFGAKVASMLNYRVVCNTSFTISNVVGPREDITIAGIPVTYMR…
HaWSD3	OTG23138	MDAIQDFNTLGSIRTTKYGETFEGFKKGVDNEEPLSPMAQLLHEPGSNVYIICFIGFKTKIRPDVIKENLVNTVVKNRRFSSLQVRDKSNGSMKWIPTHVNIDDHVIIAEQDPNIKSPEKFVENYILNLSRSGIESTKPLWDVHLIDVKTSEAKGTCVFRCHHSIGDGISLTNLLLSCTRKVSDPDSVPTIPGMDRLGAAKVANLWSRLGVFWNTFVALLMFALTGLFLEDTKSPIKGSKGVEDRPRRFVTRSLSLEDIKFVKRAMNVTFTDVVLGVTEAGMYRYIRGRYNDKNMDSPHNMRIRATIPFNLRTTMKIDDFTHKDEDGTWGNKIGYSLLPFDIRFRKDPLDYVRHANATMKRKKASLEPLFTYYFTKLVIMLFGTKVTGELTHKVVHKTT…
HaWSD4	OTG23434	MDIIPSLNTLRSIRTTKNEKTFKCFRKGEDHDQPLSPMARLFHEPGSNVYIIGIMGVKTKIRPDVFKENLVHTFLKNRRFSSLQVMDKENGSMKWIPTHVNIDDHVIIPELNPKIESPDKFVEDYISNLSRSHIENTKPLWDLHILNIKTSEAEGMCVFRFHHSLGDGMSLMNLLLACTRKVSDPEALPTLPGNNNKSGVAKVASIWSRLGVLWNSFVALLMFVLTALFLQDTKTPMKGSKGVEHRARRFIVRSVSLDDIKLVKRAMNVTLNDVVLGVTQAGFYRYLRGRYSETDDKRADIPDNMRFRATFFFNLRAATRINDYTDTDAFGTWGNKIGYSLLPFDIRFKKDPLDYVRDANSIVKQKKASLEPLFTYFFTKLFIMLFGIKAAGKLNHKVF…
HaWSD5	OTG11715	MQPSQKMGMESNEPLTPAGRLFVQPATELVINCVLGIDQSVGLETVHSVVSNSLIVKHPRFTSLLVTDKHGRERWKRVDIELDRHIIFVPDPVNDDNSDDDDEVAVNDYLANLTVSCPLSTDKPLWEMHVLDAHKCVVIRFHHALGDGVSLLSLLLTTCRRVSDGEKVPTVETTSSAVRNSREGAGICGWLKMMWLTLVYMVEFCMTCLWVRDKETVVRGGAGVELWPRKLATAKFSLDDMKTVKSAVVNATINDILFGVISSGLSRYLENHSTKPLREGLQITGAAMVNLRKSSGLQETTELMNKNSGSRWGNKFGMMLLPVYYHARGSDPLQYVKRAKIMIDNKKLSLEAFLSYKIGYFIMKCLGARFASLLNYRIICNTTFTISNLVGPKERIMIA…
HaWSD6	OTG11716	MFQEYKEEPLTPAGRLFIQPETNISVICCLGTHEPLRIDAIKSVIADSMLAKHPRLSSILVVDKNGHEYWRKTEIDMNRHIIFHNDPIEGAKDDQDAANILMADLAVSVPFETDKPLWELHLLISHKCAVIRAHHALGDGVSLLSFFLAMCRKADDPEKMPSMNPVVVTRSNGGGEAIGGILWRLLKLVWFTVVFVVDFIARVLWVRDETTVVSGGAGVELWPRKLVTARFLIDDMKIVKKYIPNTTINDVLFGIISYGLSKYLDNRSSKPLREGLRMSGVAMVNLRPQRGYQDLEELMRDPKAGWGNKFGMLVLPTYYHKSGSDPLEYLRRAKAMIDQKKSSLESFFSYKFGYLIMSILGAKYASLLNYRILCNTTFTISNVVGPKEKLTFAGHPVDY…
HaWSD7	OTG12880	MDSSKGMRHIKTTTKDGPRFREEHQPLSPMARLFHEPGSNVYVITIMGCKTKINIDVVKHNTVHSLNWHPRFSSLQVFDKETGSIRWVPTNINFDDHVIVPKIDPNIKFPDKFVDDYISNLSKSPIDNSKPLWDFHILDIKTAEDEGTGIFRFHHSLGDGLSLMTLFLSNTRQSSDINALPTLPVSKNSGYIKFTSFWSPLQVFWNSIVAVMMFIFTMLFLKDTETPLKGSMGVENRPRRFVRKTVSLADVKVVKDAMNVTLNDVALGVTQAGLSTYLNRRYGEIRDVDRTDRHDKTNFIPKNIRLRATFFFNLRATTRIDTLIETMKTGNMGHWGNQIGYVLLPFAIGLKSNPLDYVKEAKAVIDRKKSSLEPLYTYFVVYLVLKLFGIKAVGKLNHN…
HaWSD8	OTG03949	MNRSISLPEYRKLMDSSQGLKSLKQIKTSTTKDDPRFKEEDQPLSPMARLFHEPGSNVYIISMLGCKTKIKPDVIKQNLVHSLLRHPRFSSLQVTDKETGNIKWVPTNVNINNHVIVPEIDPNIEFPDKFVEDYISNLSRSSIDRSQPLWDLHLLDIKTTDAEGTGVFRFHHSLGDGLSLMTLLLACTRQASDTDALPTLPVYKHSTYIKVTSFWSVLVMLWNSIVAMMMFVCTGLFLKDTETPLKGSIGVENRPRRFVRKSVSLADVKVVKNAMNVTLNDVVLGVTQAGLSRYLNRRYSEIAGVNKTNHHDKKDFIPKDIRLRATFFFNLRATTRIHTLVDSMKAGTLGHWGNKIGYVLLPFAIGLRSNPLDYVKETKAVIDKKKASLEPLFAYFVVD…
HaWSD9	OTG03950	MKQSISLSKYRKSMGSSEGLKSLKHINTTTTKDDPRFKEEDQPLSPMARLFHEPGSNVYIVSMMGCKTKINPDVIKQNLVHSLVRHPRFSSLQVTDKETGNIKWVPTNVNIDNHVIVPEIDPNIESADKFVEDYISNLSRSSIDRSQPLWDLHLLNNIKTTDAEGTGVFRFHHSLGDGMSLMTLLLACTRQAADTDALPTLPMNKDSAYIKVTSVWSVLVMLWNSFVAMMMFVCTGLFLKDTETPLKGSAGVENRPRRFVRKSVSLADVKAVKNAMNVTLNDVVLGVTQAGLSRYLNYRYGEINRIGRGDHHDKKDFIPKGVRLRATFFFNLRATTRIDTLVESMKSGTLGRWGNQIGYVLLPFAIGLKRNPLDYVKEAKAVIDKKKVSLEPLFAYFVA…
HaWSD10	OTF91362	MNTEHDEPLSPGGRLFVQPATHQVINTAFGLERTIEPDALLTAISDSLITKHPRFSSLLVTDSDGHEHWRKVELDIHRHVIVRPDPVGEGDNNEEIVNDYLADLAVSSPLDTNKPLWEFHLLTAHKCVVMRVHHALGDGISIVSLGITMCRRLDDPEQTPTIEHLVSSTQKAENPGRLEKILKVLKMVWFSLMYAFEFIIRAVWVKDRKTVLRGGEGVELWPRKIATAKFSLQDMKTVKNVVTNATINDVLFGVISSGLSKYLDSRLLDYIQEGLQITGVALVNLRPSPGLKDMKELMKKNAGTAGWGNKVGFMLLPVYYHRNRSDPLQYLKRAKLMMDRKKLSMEAFLSHHIGCFLMKFFGAKFASSLSYRVACNTSFTFSNVVGPRDEMTVAGIPIK…
HaWSD11	OTF91364	MEIDEPLSPGGRLFVQPATHQIINSVFGLEQPITLDALRTVISSSLLIKHPRFSSLLVTDNHGREHWRKTEIDINRHIIIRSNPVGEGDNDEEVVNEYLADLTVSAPLTTDKPLWEVHLLSAHKCLVLRIHHALGDGISLVSLMLTLCRKLDDPEQTPTIGPLTSSTQKHKNSGTLESILKLVKMVWFTLVYVFEFMMRGAWVKDGKTAVRGGEGVELWPRKLVTAKFSFEDMKTVKSAVANATINDVLFGVISSGLSKYLDSRSPDSLPEGLQMTGVALVNLRPSPGLQDIKELMKKNAGTAGWGNKVGIVLLPVYYHRNRSDPLQYLKRAKMMMDRKKLSMEAFLSHQIGYFVMKYFGAKVASLLEYKVICNTSFTISNVVGPREEITVTGIPITYM…
HaWSD12	OTF86778	MELKVEVGCVEDVTMSEPVSPTGQYFNSSVLSISIICILEFENPIDDSSSLALINNVFLPINPRFSSIMVKDGEGGKLWKRVEVKGEDHIKVPVFPEGLSPESYDHYFNDYLSKIAMDPLPQTRPLWEIHVFKYPTSNASGSLIFKLHHALGDGFSLMGALLSCLQRADNPSLPLTFPNFQKSPKQDSEIKSLMSVVPHALCGALNTVLDFGWSLLKSSFLEDNQTPIRSGKEGVEFRPINIMTMTFSLDQIKKIKTSLQVTINDVITGIIFLGTRLYMEETCEEAKNATSTALVLLNTRSIGGYKSVNEMVQNQEAQIQWGNQFGFLHVSLPKLHQYDQRLNPLKFVQETQNIIKKKRNSSAVYLTGMLLESVRKYRGPEATAEYIHNTLRNSSMTVS…
AtWSD1	AT5G37300.1	MKAEKVMEREIETTPIEPLSPMSHMLSSPNFFIVITFGFKTRCNRSAFVDGINNTLINAPRFSSKMEINYKKKGEPVWIPVKLRVDDHIIVPDLEYSNIQNPDQFVEDYTSNIANIPMDMSKPLWEFHLLNMKTSKAESLAIVKIHHSIGDGMSLMSLLLACSRKISDPDALVSNTTATKKPADSMAWWLFVGFWFMIRVTFTTIVEFSKLMLTVCFLEDTKNPLMGNPSDGFQSWKVVHRIISFEDVKLIKDTMNMKVNDVLLGMTQAGLSRYLSSKYDGSTAEKKKILEKLRVRGAVAINLRPATKIEDLADMMAKGSKCRWGNFIGTVIFPLWVKSEKDPLEYIRRAKATMDRKKISLEAFFFYGIIKFTLKFFGGKAVEAFGKRIFGHTSLAFSN…
AtWSD2	AT1G72110.1	MAIERQVTEAEEPVSPFARLFSLPGLDVFNIVTIGCKTEGNASTIVEGIKNTLINHPRFSSILVTGHGEHKGKARWIPTKINVEEHVIVPDIDPNIENPDEFLEDYTSNMALSPMDMSKPLWEFHLLKLKTSHAEAVTVARFHHSLGDGMSLMSLLLACTRKTCDPEAFPTFVAPKKNKAKNVCFSLVAWLWFIVRLMFHTCVEVIKSIVFICRASDTSAHIMGKPGATLSANKFIHRIISLDDVKMVKNAMNMTVNDVLFGMVQAGLSRYLNQRYDLETSSKSRKNLHNIGLHGVVFFNLRPNRNIEDLAKMMAKGSKCRWGNSIGYVLIPLGMKPQDDVFEYVRQAKTIMDGKKHSLEPLFSYGLLKVTMEVFGLRGLKTLVKRIFGSTTMIFSNVV…
AtWSD3	AT2G38995.1	MYTMKKGKDMAKEEQETAAIEPLSPVSQLFVSPSLYCFIIFTLGFQTRCNPSTIVEGVKNTWIKLPRFSSKVKVNDVLLGMTQAGLSRYLSRKYDEDMVVEKKKNLEKIRLRGTVFVNLRADTKLEDLANMMAKGSKCRWGNFVGVIIFPLWVRSEDDPLEYVRRAKSTMDIKKLSIESLICYGLIKLTRKILGGKVVETLVRRLFDHTTLTFSNVMGPDEDISFFDHPMSYVAASALGGPQALIIHYVTYVNKIVINLAVDTSVIRDPHLLCDDLVESLDIIKLAAMEKGVHKMEV
AtWSD4	AT3G49190.1	MEIETRPHISGDEKEEEQPLSPAARLFHAPEFNCNIISVIGFKSKLDPCVFIRGFKESFIRHPRFSSKLVTDENGQNQRWVRTNVVVEDHFIVPKIKPQNIENSNAFLEDYVSDLMKIPLDTSRPLWELHLLDLKTSDAENVAVLKIHHSVGDGMSIMSLVLACMRKTSNPDELPSLPYQYRSSSRSSLLTTGSRSDSRLLWLVKVIWTAVILGLNTVCDALEFIVTTLFVKDTETPIKGDFLSTKSKQLRLVHRTVSLDDIKLTKNAMNMTINDVVLGVTQAGLSRYLARRYGEEETKNRKQKKLPKRIRLRSALLVNLRPTTGIQDLADMMEKGSKCRWGNWFGYVVFPFSIALRDDPLEHLEIAQKTISRKKNSYGAMLTYIFCRIIVKLLGIKVA…
AtWSD5	AT3G49200.1	MEIKIRRRRGQIAETTVKKEVEEEEQPLSPAARLFHAPEFNCYIISVVGLKNKIEPDMIIEGIKQTLMRHPRFSSKLVNNCNNNRQEQKWVRTNVVVEDHVIIPKIQTQHIENANADVFLESYVSDLTTIPLDTSKPLWEVHLLDLKTSDAENVAVLRIHHSLGDGMSMMSLVLACTRKTSNPNELPSLPYQNRPSSGSSSLKTSSRCYSRFFWLVMVLWSAALLVLNTVCDALEFIATALFLKDTETPIKGDFKLSKGKRMCMVHRTVSLDDIKLIKNAMKMTVNDVVLGVSQAGLSQYLKRRYGEQEESKRNSSNIPKGIRLRAALLVNLRPTTGIQDLADMMTKGSKCRWGNWIGYIIFPFSIALCDDPLKHLRRAKSTIDRKKNSLEAVLTFVVG…
AtWSD6	AT3G49210.1	MEIKTRRDTSETSVRKDDEEEVEEEQPLSPAARVFHAPEFNCYVISVIGIKKKIDPDVIIEGLKQTLIRHPRFSSKMVSTSVGNKKRQTQSWVRTNVVVTDHVIVSDIQTQNIENGNADAFLETYVSNLTTVPLDISKPLWQLHLLDLKTSDAENVAVLKFHHSLGDGMSLMALVLACMRKTSNPDELPSLPNQNRSSSRSSRLMAGSRGDSRFLWLVMVIWSAIMLVLNTVCDALEFIATTMFLKDTETPIKGDFRFSKSKRMCLVHRTVSLDDIKLIKNTMKMTVNDVVLGVSQAGLSQYLDRRYGEKKKKVGEDQDSKRKATDMPKRIRLRSALLVNLRPNTGIQDLADMMAKGSTCRWGNWIGYIVFPFSIGLRDDPLQHLRRAKRIIDRKKNSL…
AtWSD7	AT5G12420.1	MTYGEEEPVSPMARVFQSPGIDLCAVTIMGFKTKINPDVVLDALKQNVSKHPRFSSILSDNGAKWIETEVNVEDHVIVPYIDAEEIGEGGQSFIDDYMSRLTMIPLDRSRPLWDIHILNVKTSEAEAVGFIRSHHSLGDGMSLISLMLACTHKTSDPDMFSNAIPSMKRRATMSHSLKTKGWFLRSIFTIGSTMRLLWNTTIDMLLLLATVLFLKDTKTPLKAGADVRSNPKRFYHRIISLDDIKLIKNAMNMTINDVLFGITQASLSHYLNRQYGTKKEEDGALTSYRNNLPDGIRFRVACTVNLRSDIGFKPLADMMVKDSKCRWGNYFSFIFLPFTIGLQTDPLVYLKMSKSMMARKKHSYHAALVYFIIKIVLKVFGAKAAAELFDRPVRNTTTC…
AtWSD8	AT5G16350.1	MKNEEEEPLSPMARVFQSPDIDLCAIINIGFKTKINPDVVLDALKQNVYKHPRFSSKLSENGEKWIETEVNVEDHVIVPYIDPEDICEGGQSFVDDYISRLTLIPLDRSRPLWDIHILNVKTSYAEAVGVIRFNHALADGMSFISLVLACTHKTSNPDMLSTAIPSVKRRSTVSHSLKKTGWFLTAIFTIGSTMRLIWNTLVDMFLLFATMLFLKDTKTPLKGGANVRSNPKTFYHRNISLDDIKLIKNAMNMTINDVLLGITQAALSSYLNRRYEHENNNEEDGVLTSYTNNLPDRIRFRAGCTVNLRSDIGFKPLAEMMVKDSKCRWGNYFSFIILPLSISLETDPLVYLNKSKAMMARTKHSYQAALTYFLIKISLKVLGAKATTSLFNQHLMNIT…
AtWSD9	AT5G22490.1	MEKKMKEEEEEPLSPMARAFQEPSIDCGIVIKFGCKTKINPDVIVDSLKLNVFKHPRFCSLLDDDGTKWLRTDVVNVEEHVFVPDIDPKLTEEDVEWFVEDYISSITMIPLDRTKPLWEVHILNAKTSDAEAICVIRCHHALGDGVSILSLILASTRKTSEPEAFSTLPVPKCRESYNHRRGFSFFRLVLVVCSTVRLIWNTLVDSFLCMATIFFLKDTDTPLKGKPGAIKKFSHRIVSLDDIKLIKNAMEMTINDVLLGVTEAALTRYLHQSYDKTNEEAGTSLTPNRQDLLDRIRLRSLIVVNLRPTGSQSIADMMAKGSKCRWGNYISVILFPFTIALQSDPLVYLSNVKSMIDRKKNSLITYIIYTFSEFVIKAFGINVAVAFQRKIMLNTTMCI…
AtWSD10	AT5G53380.1	MTKEEVEEEPLSPMARLFQSPGIENCIITMIGFKAKINPDIILDDLKHNVSKHPRFCSKLSDDGERWMKTKVNVEDHVFVPDIDLQEINKDGDGFVDDYVSRLTLSPLDKSKPLWDIHILNVKTSDAEAVGVMRCHHSLADGMSLMSLLVACTRKTSNLESFPTIPAIKRREQMMSHRFGNKGWYSRSINAVYYAVRLIWNTIVDLLLLWATSLFFKDTETPISEGIGSGNNARRFYHRTVSLDDIKLIKNAMKMTINDVLLGVTQDALSRYLNQRYGDKNGEGVTTTSNLNNLPGKIRIRAGVAVNLRQDIGIQPLEDMLAKDSKCRWGNYDSLVFVPFSISLETDPLVPLLKAKSIMDRKKHSLVAPMHYSIIEFIINTFGTKVFNRTCSNTTTILS…
AtWSD11	AT5G53390.1	MGEDKKTARETVEEEPLSPCSRLFNSPDFNCAIIVTMGSKVKGDTPAIIHGLEHTLVNHPRFSSILEMNNGKKPRWVRTKVKVEEHVIVPDVDPDIENPDQYLEDYISKLTTIPMDLSKPLWEMHLLGVKTSNAESYAILKIHHSLGDGMSLMSLLLACTRKTSDPEALPTVAVHKKRFGPSCNSGFFNKIWWLFVGLWFILRLLFNTFVDILMFALTIFVLRDTETPLLAKPGSELIPKRFVHRIISFDDVKLVKNAMKMTVNDVLLGVTQAGLSRYLSRKYDQEATPKSKESMRRIRLRSAIMINLRPNAGIEALADMMAKKSKCRWGNLFGYILLPFSVGLETDPLEYVRQAKATIDRKKHSLEAVFSMAFFKLILKVLGLKASVVLVRKVIHSTT…
